# Supplementary material for: Differential Impacts on Host Transcription by ROP and GRA Effectors from the Intracellular Parasite Toxoplasma gondii
Source: bioRxiv or medRxiv preprint supplement (doi:10.1101/2020.02.04.934570), 2020-04-14

**Figure S4**

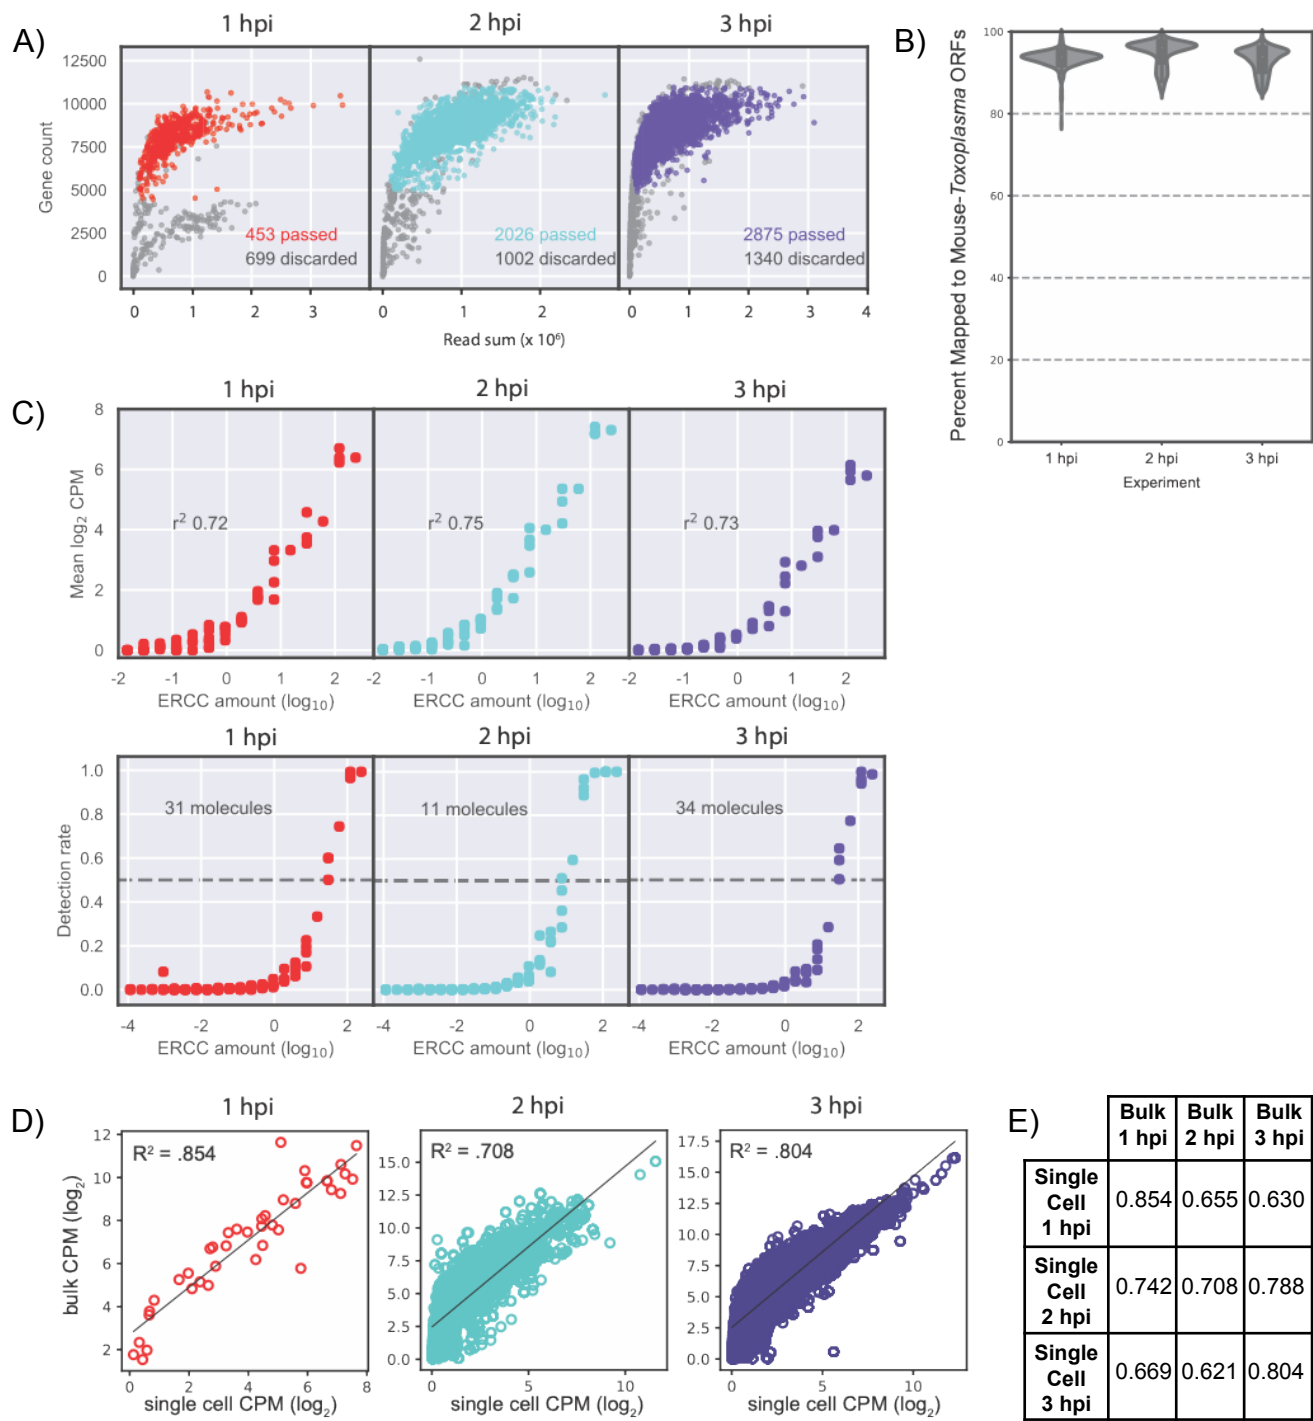

Supplement: Supplementary file [file media-4.pdf]
